1 **Climate adaptation and vulnerability of foundation species in a global change hotspot**

2 Cristóbal Gallegos, Kathryn A. Hodgins\*, Keyne Monro\*

3

4 School of Biological Sciences, Monash University, Melbourne, VIC, Australia

5 \*Joint senior authors

6 Corresponding author: Cristóbal Gallegos (+61 452260992, [cristobal.gallegossanchez@monash.edu](mailto:cristobal.gallegossanchez@monash.edu))

7

8 Running title: Climate adaptation and vulnerability

9

10 Acknowledgements:

11 We thank Chris Lee for valuable help with laboratory work, Javiera Olivares for valuable help in  
12 sampling of specimens, and Fisheries Victoria and Parks Victoria for collection permits. This research  
13 was supported by a Holsworth Wildlife Research Endowment awarded to CG, and by grants awarded  
14 under the Australian Research Council's Discovery Scheme to KM and KH.

15 **Abstract**

16 Climate change is altering species ranges, and abundances within ranges, as populations become  
17 differentially adapted and vulnerable to the climates they face. Hence, characterising current ranges,  
18 whether species harbour and exchange adaptive genetic variants, and how variants are distributed  
19 across landscapes undergoing rapid change, is crucial to predicting responses to future climates and  
20 informing conservation strategies. Such insights are nonetheless lacking for most species of  
21 conservation concern. We characterise genomic patterns of neutral variation, climate adaptation, and  
22 climate vulnerability (the amount of genomic change needed to track climate change by adaptation) in  
23 sister foundation species, the endemic marine tubeworms *Galeolaria caespitosa* and *Galeolaria*  
24 *gemineoa*, across a sentinel region for climate change impacts. First, species are shown to be partly  
25 sympatric despite previous support for non-overlapping ranges, and genetically isolated despite  
26 known capacity for hybrid crosses to yield viable early offspring. Second, species show signals of  
27 polygenic adaptation, but to differing components of temperature and involving mostly different loci.  
28 Last, species are predicted to be differentially vulnerable to climate change, with *G. gemineoa* — the  
29 less genetically diverse species — needing double the adaptation to track projected changes in  
30 temperature compared to its sister species. Together, our findings provide new insights into climate  
31 adaptation and its potential disruption by climate change for foundation species that enhance local  
32 biodiversity, with implications for evolutionarily-enlightened management of coastal ecosystems.

33 **Key words:** climate change, thermal adaptation, genomic vulnerability, genotype-environment  
34 associations, genetic offset, seascape genomics, temperature components

## 35 **Introduction**

36 Global climate change is redistributing Earth's biodiversity. Geographic ranges are shifting as species  
37 move to track tolerable climatic conditions, and abundances are changing within ranges as  
38 populations adapt, or grow maladapted and thereby vulnerable, to the climates they face (Pecl et al.,  
39 2017; Scheffers et al., 2016). Understanding current ranges, whether species harbour (and exchange)  
40 different genetic variants involved in climate adaptation, and how such variants are distributed across  
41 landscapes undergoing rapid climate change, is therefore key to predicting responses to future change  
42 and informing conservation strategies (Teixeira & Huber, 2021; Willi et al., 2022). This remains  
43 challenging for many species, especially those that are cryptic or unsuited to traditional ways of  
44 inferring adaptation and persistence (reciprocal transplants, multi-generation breeding experiments,  
45 etc.). However, emerging tools linked to the rise of population genomics for non-model organisms in  
46 recent years are set to provide new insights into climate adaptation and vulnerability for understudied  
47 species of conservation concern (Hoffmann et al., 2021; Hohenlohe et al., 2021).

48 Genomic prediction of climate adaptation relies on genome scans and genotype-environment  
49 associations to identify putatively adaptive loci harbouring variants (alleles) whose frequencies covary  
50 with climate across species ranges (Forester et al., 2016; Rellstab et al., 2015). Then, using machine  
51 learning- or distance-based methods and climate forecasts, climate-adaptive variants can be projected  
52 across space and through time to assess genomic vulnerability (also called genetic offset) as the  
53 predicted difference in their distributions across present and future landscapes (Fitzpatrick & Keller,  
54 2015) — in other words, the amount of genomic change needed to track climate change via  
55 evolutionary adaptation (Capblancq et al., 2020; Hoffmann et al., 2021). Notwithstanding the  
56 challenges of validating predictions (Hoffmann et al., 2021; Rellstab et al., 2021), assessing genomic  
57 vulnerability offers new scope to ask how populations and species of high ecological importance, but  
58 limited tractability to experimentation, may fare in future climates, identifying those at most risk of  
59 decline as those needing to evolve the most to keep pace with change and avert maladaptation.  
60 Combining such assessments with insights from neutral genomic variation, moreover, allows  
61 population structures and species barriers to be explored from both neutral and adaptive perspectives,

62 with differing implications for population dynamics, species range shifts, and management actions  
63 under climate change (Hohenlohe et al., 2021; Kardos et al., 2021; Willi et al., 2022).

64 Accordingly, mounting studies have assessed genomic vulnerability in the context of climate  
65 change for individual species — mostly trees (Borrell et al., 2020; Ingvarsson & Bernhardsson, 2020;  
66 Jia et al., 2020; Pina-Martins et al., 2019) or marine counterparts (Vranken et al., 2021; Wood et al.,  
67 2021), but also birds (Bay et al., 2018). Yet rarely, if ever, has the approach been extended to related  
68 species in overlapping ranges (but see Nielsen et al., 2021), despite the impacts of dispersal and gene  
69 flow not just across populations, but across partial species barriers. Introducing new adaptive variants  
70 from one population or species to another, for example, may create highly-fit hybrids that increase  
71 population sizes in the short term (Fitzpatrick et al., 2020) or rates of adaptation in the longer term  
72 (Grant & Grant, 2019; Mitchell et al., 2019). Conversely, it may cause outbreeding depression if  
73 distantly-related genomes are less compatible (Frankham, 2015), or expose variants to new  
74 environments in which they are maladapted (Hoffmann & Sgrò, 2011; Polechová, 2018). Over time,  
75 species lines may blur, or species that are less vulnerable to climate change may displace species that  
76 are more so, at a net cost to biodiversity (Román-Palacios & Wiens, 2020; Todesco et al., 2016).  
77 From this perspective, multi-species assessments of genomic vulnerability may help to identify  
78 whether genetic lineages are on distinct (and potentially adaptive) evolutionary pathways linked to  
79 climate, and could therefore warrant separate management to conserve their genetic uniqueness (Willi  
80 et al., 2022).

81 Gaps also exist in our understanding of adaptation and vulnerability to different components of  
82 climate change, which is altering not only the mean values (trends) of key variables, but also their  
83 variability, extremes, and the extents to which they vary predictably or stochastically (Fischer &  
84 Knutti, 2015; Ruokolainen et al., 2009; Waldock et al., 2018). By imposing different selective  
85 pressures, these components of climate change may have different consequences for biodiversity and  
86 lead to different risks of population decline (Bitter et al., 2021; Kingsolver & Buckley, 2017; Lande,  
87 2014; Rescan et al., 2021; Ripa & Lundberg, 1996). To date, however, most assessments focus on  
88 adaptation to climate variables or proxies (precipitation, temperature, vegetation, elevation) relevant

89 to terrestrial systems, whereas marine systems are underrepresented by comparison (Grummer et al.,  
90 2019; Lotterhos et al., 2021). Marine species often have high fecundity, large effective population  
91 sizes, and long-range dispersal at early life stages (gametes, embryos, and larvae) with high mortality,  
92 so that gene flow, selection, and drift play out in oceanographic settings that can strongly couple  
93 physical and evolutionary processes, while also decoupling the environments of early stages and  
94 adults. Trends in key variables (such as temperature), moreover, are less striking and immutable than  
95 they are on land (Gaylord & Gaines, 2000), potentially giving other components of change greater  
96 influence. Marine systems can therefore offer new genomic insights into climate adaptation and  
97 vulnerability (Liggins et al. 2020), but studies remain rare (Vranken et al., 2021; Wood et al., 2021).  
98 They have not explored adaptation to environmental predictability, and are lacking for many species  
99 of ecological importance in regions undergoing rapid climate change where increased adaptation can  
100 be expected (Hill et al., 2011; Lotterhos et al., 2021).

101 Southeast Australia is a climate change and biodiversity hotspot, identified as one of the world's  
102 fastest warming marine regions and one of its most biologically diverse (Frusher et al., 2014; Hobday  
103 & Pecl, 2014; Ramírez et al., 2017). East-west divergence of populations and species in the region is  
104 often attributed to geographic isolation by the historical land-bridge joining Tasmania and mainland  
105 Australia during the last glacial maxima (Dawson, 2005; O'Hara & Poore, 2000). The region also sees  
106 two boundary currents — the East Australian Current flowing south from the tropics, and the Zeehan  
107 Current flowing east from the Great Australian Bight — converge with subantarctic water in Bass  
108 Strait, generating complex gradients of temperature and flow that may mediate postglacial dispersal,  
109 drift, and selection (Miller et al., 2020; Waters, 2008). Those gradients are set to steepen as the East  
110 Australian Current continues to warm and intensify southward (Hobday & Lough, 2011; Ridgway &  
111 Hill, 2009), making the region a natural laboratory for studying climate adaptation and vulnerability  
112 in order to better predict the fate of biodiversity in future climates.

113 Here, we investigate climate adaptation and vulnerability in an endemic ecosystem engineer, or  
114 foundation species — the marine tubeworm, *Galeolaria* — across the southeast hotspot. *Galeolaria*  
115 comprises cryptic sister species that are geographically concordant with neutral genetic markers

116 (placing *G. gemineoa* to the northeast and *G. caespitosa* to the southwest; Halt et al., 2009) yet are  
117 still able to interbreed (Styan et al., 2008). Their ranges, population structures, frequency of  
118 hybridization, and potential adaptation to climate are unknown. We therefore characterized genomic  
119 variation among populations of each species throughout the hotspot to assess genomic divergence,  
120 diversity, and gene flow within and between species. We further identified candidate adaptive loci and  
121 associations with different components of temperature for each species, then modelled allele turnover  
122 at candidate loci in current and projected climates to predict where populations are most vulnerable to  
123 loss of adaptation with ongoing climate change. Our analyses reveal these species to be genetically  
124 distinct despite partial sympatry across the hotspot, support climate adaptation in both species, and  
125 identify populations that could face greater risk of decline unless they adapt rapidly to near-future  
126 climates. Such insights into the nature of biodiversity across the hotspot could enhance evolutionarily-  
127 enlightened management and conservation strategies in a sentinel region for understanding climate  
128 impacts.

129

## 130 **Methods**

### 131 *Study system*

132 *Galeolaria* is an ecosystem engineer endemic to rocky shores of southeast Australia, where its dense  
133 colonies of stony tubes enhance local biodiversity by providing habitat and climate refugia for species  
134 that cannot otherwise persist there (Figure 1A; Wright & Gribben, 2017). Year-round, adults release  
135 gametes into the sea for external fertilization and embryogenesis (Chirgwin et al., 2020, 2021), then  
136 larvae spend ~2–3 weeks offshore, dispersed by currents, before transitioning to sessile life stages  
137 (juveniles and adults) onshore in the intertidal. As for other aquatic ectotherms, planktonic stages are  
138 thermal bottlenecks in the lifecycle, defining vulnerability to climate as well as population structure  
139 across species' ranges (Dahlke et al., 2020; Lotterhos et al., 2021; Rebolledo et al., 2020). *Galeolaria*  
140 *caespitosa* and *G. gemineoa* are said to diverge in the southeast hotspot near Ninety Mile Beach, due

141 to historical vicariance, dispersal limitation, or lack of rocky habitat (Figure 1B; Styan et al. 2008;  
142 Halt et al. 2009).

143

#### 144 *Sampling throughout the southeast Australian hotspot*

145 We sampled adult populations of *G. caespitosa* and *G. gemineoa* from 30 locations spanning ~800 km  
146 of coast throughout the hotspot (Figure 1B; Table S1) in January 2019. Locations were separated by  
147 ~20 km (subject to accessibility and species detection) and were chosen to capture thermal variation  
148 in each species' range. Each of 10 to 15 individuals per location was immediately extracted from its  
149 tube, spawned for 5 minutes in filtered seawater to minimize contamination by gametes, then rinsed  
150 and placed in an Eppendorf tube with 70% ethanol. Individuals were transported to the lab and stored  
151 at room temperature (~22 °C) until DNA extraction.

152

#### 153 *DNA extraction, library preparation, and sequencing*

154 We extracted DNA from the posterior ~5 mm of each individual. We digested tissue overnight with  
155 proteinase K, then extracted DNA using the Qiagen DNeasy Blood and Tissue Kit following  
156 manufacturer instructions (Qiagen, 2006). Quality was checked by running individual samples on 2%  
157 agarose gel stained with ethidium bromide and also with a UV-Vis Spectrometer (NanoDrop 1000,  
158 Thermo Scientific). Quantity was checked with a QuBit fluorometer (dsDNA HS, Invitrogen).

159 Library preparation followed a double-digest (with *HF-PstI* and *MspI* restriction enzymes),  
160 genotype-by-sequencing (ddGBS) protocol with equal amounts of DNA per individual (Poland et al.,  
161 2012). The protocol was modified by performing PCR reactions for individual samples, then pooling  
162 equal amounts of the PCR products. A size selection step was also added to focus on fragments  
163 between 400-600 bp. Sequencing was performed in two batches, one by GenomeQuébec (Montréal,  
164 Canada) and one by GENEWIZ (Suzhou, China). Both batches used one lane of Illumina HiSeq 4000  
165 (paired-end, 150 bp).

166 *Identifying single nucleotide polymorphisms (SNPs)*

167 Reads were quality-checked using FastQC

168 (<https://www.bioinformatics.babraham.ac.uk/projects/fastqc/>), then demultiplexed and cleaned using

169 *process\_radtags* in the Stacks software pipeline (Catchen et al., 2013; Catchen et al., 2011). To

170 optimise parameter values for identifying SNPs, we ran the pipeline nine times using a range of values

171 for a subset of 16 individuals, then explored key statistics including the distribution of SNPs per locus

172 and the number of loci shared by at least 80% of individuals (Paris, Stevens, and Catchen 2017;

173 Rochette and Catchen 2017). Based on results, we called SNPs for all individuals using values of  $m =$

174 3,  $M = 5$ , and  $n = 5$ .

175 We filtered SNPs in several steps. First, we filtered loci with low allele frequencies in *Stacks*

176 (with *min\_maf* = 0.01). Next, we filtered the remainder in *vcfR* v1.8.0 (Knaus & Grünwald, 2017),

177 *adegenet* v2.1.1 (Jombart, 2008), and *gaston* v1.5.6 (Perdry & Dandine-Roulland, 2020) to keep only

178 biallelic loci with depth > 5, genotype quality > 30, and linkage disequilibrium ( $r^2$ ) < 0.8, and to

179 exclude individuals missing more than 60% of loci. Last, we excluded loci missing more than 55% of

180 data across individuals and used this large SNP set for genotype-environment association analyses.

181 For analyses of population genetic structure, which do not require large numbers of SNPs, we used a

182 reduced SNP set that excluded loci missing more than 30% of data across individuals.

183 All remaining data analyses were performed in R v.4.0.5 (R Core Team, 2021) unless otherwise

184 stated.

185

186 *Environmental data*

187 We obtained a high-resolution (1 km<sup>2</sup> grid cell) satellite-based time series of sea surface temperature

188 from January 2010 to December 2018 ([www.ghrsst.org](http://www.ghrsst.org)), and extracted daily observations for all 30

189 locations. We summarised data using ten variables based mostly on the WorldClim scheme (Fick &

190 Hijmans, 2017; Hijmans et al., 2005), then selected four that captured different components of change

191 in temperature and had pairwise correlations below |0.7| (Table S2). They were the mean temperature

192 (a measure of trend), maximum temperature of the warmest month (a measure of extremity), mean



193 monthly temperature range (a measure of variability), and temperature noise structure (a measure of  
194 stochasticity). See supplementary material for details of calculations.

#### 195 *Analyses of population genetic structure*

196 **Genetic clustering.** To explore genetic differentiation between populations of each species, we  
197 clustered loci using a principal components analysis of genetic variation in the *adeigenet* package  
198 (v2.1.1; Jombart, 2008). We also estimated the ancestries of individuals, and levels of admixture  
199 among ancestral lineages, using the ADMIXTURE program (Alexander et al., 2009). The parameter  
200  $K$  (presumed number of ancestral lineages) was set to 2, which minimized cross-validation error in  
201 preliminary analyses. Setting higher values of  $K$  did not alter our results.

202 **Genetic diversity.** To explore genetic diversity within populations of each species, and because some  
203 loci were polymorphic between species but not within them, we filtered out loci that were  
204 monomorphic or unique to one species. For each population, we then calculated standard measures of  
205 diversity — observed heterozygosity ( $H_O$ ), expected heterozygosity ( $H_S$ ), inbreeding coefficient ( $F_{IS}$ ),  
206 and allelic richness (AR) — averaged across loci in *hierfstat* v0.5-7 (Goudet & Jombart, 2015). We  
207 compared diversity between species using  $F$ -tests from linear models with species as a categorical  
208 fixed effect. Checks of model assumptions using diagnostic plots of residuals detected no serious  
209 violations.

210 **Genetic isolation by distance.** To identify evidence for greater gene flow among geographically  
211 proximate populations of each species, we first calculated pairwise genetic distances ( $F_{ST}$ , also  
212 averaged across loci) between populations in *hierfstat* v0.5-7 (Goudet & Jombart, 2015). To reduce  
213 sampling error, populations represented by less than three individuals were excluded from  
214 calculations (Nazareno et al., 2017). To assess the relationship between genetic isolation and  
215 geographic distance in each species, we tested the correlation between matrices of pairwise genetic  
216 distances ( $F_{ST}/1 - F_{ST}$ ) and geographic distances (calculated with the *geosphere* package; (Hijmans et  
217 al., 2017) using a Mantel test based on 999 permutations in *dartR* v1.8.3 (Gruber & Georges, 2019).

218

219 **Genetic isolation by temperature.** To assess the relationship between genetic isolation and thermal  
220 environment in each species, we calculated environmental distances based on temperature variables in  
221 the *ade4* package (Dray & Dufour, 2007), then tested their correlation with genetic distances using a  
222 Mantel test in the same package.

223

224 *Analyses of climate adaptation and vulnerability*

225 **Candidate loci for thermal adaptation.** To search for candidate adaptive loci that diverge among  
226 populations in association with temperature variables, we performed a redundancy analysis for each  
227 species using the *vegan* package (Oksanen et al., 2016). This two-step extension of linear regression  
228 to multivariate responses identifies loci that covary in response to multivariate environments, and  
229 provides a superior combination of low false-positive and high true-positive rates to other methods  
230 (Forester et al., 2018). Here, it involved regressing loci on temperature variables to compute a matrix  
231 of predicted genotype-temperature associations, then applying principal components analysis to the  
232 matrix to compute four uncorrelated principal components, or ordination axes (RDA1–RDA4),  
233 comprising linear combinations of variables that explain those associations. Candidate loci were  
234 identified as outliers on ordination axes based on scores at least three standard deviations from the  
235 mean score per axis (two-tailed  $P$ -value = 0.003). Because the method does not tolerate missing data,  
236 missing genotypes were imputed by population using the most common genotype per locus. If loci  
237 were missing or tied, we used the most common genotype in all samples (Forester et al., 2018).

238 To cross-validate results with those from alternative approaches, we performed equivalent  
239 univariate analyses using the standard covariate model and default settings in the BayPass program  
240 (Gautier, 2015). We identified candidate loci based on  $P$ -values of  $XtX$  statistics ( $F_{ST}$  analogues  
241 accounting for population structure) and inferred associations with temperature variables based on  
242 Bayes factors greater than ten (“strong evidence”; Gautier 2015). We then tested the overlap of  
243 candidates identified by each method using one-tailed hypergeometric tests. As further cross-  
244 validation, we repeated the redundancy analysis with distance-based Moran’s eigenvector maps  
245 included to account for population structure (Forester et al., 2018).

246

247 **Genomic vulnerability to climate change.** To predict each species' vulnerability to future climate  
248 change, we modelled temperature-driven turnover in alleles at candidate loci using gradient forest  
249 regression models (Fitzpatrick & Keller, 2015), then mapped current and future turnovers throughout  
250 the study range. We fitted each model using minor allele frequencies at candidate loci that overlapped  
251 redundancy and BayPass analyses as the response variables, temperature variables as predictors, and  
252 constructed 2000 regression trees per locus using default settings in the *gradientForest* package (Ellis  
253 et al., 2012).

254 To map current turnover, we extracted temperature variables for each grid cell in the study range  
255 and transformed variables into genetic importance (relative contributions to turnover) using the  
256 turnover function estimated by the model (Fitzpatrick & Keller, 2015). We then summarised  
257 transformed variables as three principal components, assigned each component to a RGB colour  
258 palette following Ellis et al. (2012), and mapped colours to grid cells using the *raster* package  
259 (Hijmans, 2017). Mapped this way, colours predict genetic compositions (allele frequencies) in cells,  
260 and locations with similar colours are predicted to harbour populations with similar compositions.  
261 Biplots of the two largest principal components were used to relate turnover in composition to  
262 changes in temperature (Ellis et al., 2012).

263 Rather than map future turnover directly, we translated it to the genetic offset needed to maintain  
264 thermal adaptation under climate change (Ellis et al., 2012; Fitzpatrick & Keller, 2015). To do so, we  
265 repeated the process above with mean and maximum temperatures projected for 2050 and 2100 under  
266 low (RCP45) and high (RCP85) CO<sub>2</sub> emission scenarios, extracted for each grid cell from the Bio-  
267 ORACLE database (Assis et al., 2018; Tyberghein et al., 2012). Since other variables were  
268 unavailable, we also re-calculated current turnover without them. For each cell, we transformed  
269 variables into genetic importance as above, calculated genetic offset as the Euclidian distance between  
270 current and future genetic compositions, then mapped offset as above.

271 **Results**

272 *Variant identification*

273 Sequencing returned an average of 3,392,340 quality-filtered reads per individual, with an average  
274 depth of coverage of 24.1-fold. Stacks (Catchen et al., 2011) identified 8,887,109 putative SNPs from  
275 330 individuals. Filtering retained 8,788 unlinked loci from 272 individuals (with 16.1% of data  
276 missing across loci and individuals) for analyses of population genetic structure, and 24,263 unlinked  
277 loci from 272 individuals (with 31.3% of data missing across loci and individuals) for genotype-  
278 environment association analyses.

279 *Analyses of population genetic structure*

280 **Genetic clustering.** Principal components analysis of genetic variation revealed two distinct genetic  
281 clusters defined by PC1 and PC2, jointly accounting for 42.1% of the multilocus genetic variation  
282 sampled (Figure 1C). Most individuals in one cluster were sampled northeast of Wilsons Promontory  
283 (to Merimbula, our northernmost location; Figure 1B), whereas most individuals in the other cluster  
284 were sampled west of this point (to Glenaire, our westernmost location; Figure 1B). However,  
285 multiple individuals from western locations clustered with the ‘northeastern’ cluster, and one  
286 individual from a northeastern location clustered with the ‘western’ cluster (Figure 1C).

287 ADMIXTURE analyses confirmed the presence of individuals from different ancestral lineages in  
288 western and northeastern populations (Figure 1B and 1D), but detected little gene flow between  
289 lineages (individual ancestry proportions consistently exceeded 0.99, shown by single-coloured bars  
290 in Figure 1D). Based on known distributions of *Galeolaria* species (Halt et al., 2009), the  
291 ‘northeastern’ cluster is *G. gemineoa* and the ‘western’ cluster is *G. caespitosa*, but species are now  
292 shown to be sympatric in some locations, especially west of Wilsons Promontory (Figure 1B).  
293 Subsequent analyses were therefore separated by species. We also explored genetic clustering within  
294 species but detected none at this level (Figure S1), as was further confirmed by within-species  
295 ADMIXTURE analyses.

296 **Genetic diversity.** Of the reduced SNP set, 2,495 loci were polymorphic within species and shared  
297 between species. On average, measures of genetic diversity based on these loci were significantly

298 lower for *G. gemineoa* than for *G. caespitosa*, except for inbreeding coefficients (Table 1). These  
299 coefficients were positive and similar in magnitude ( $\sim 0.21$ ) for both species, indicating that their  
300 populations harbour fewer heterozygotes than expected under Hardy-Weinberg equilibrium.

301 **Genetic isolation by distance.** Mean pairwise genetic distance ( $F_{ST} \pm SE$ ; see Figure S2 for all  
302 values) was relatively low for both species (*G. caespitosa*:  $0.066 \pm 0.001$ ; *G. gemineoa*:  $0.062 \pm$   
303  $0.001$ ) but significantly lower for *G. gemineoa* ( $F_{(1, 305)} = 6.567$ ,  $P < 0.02$ ). Mantel tests failed to  
304 detect an association between pairwise genetic distance and geographic distance for either species (*G.*  
305 *caespitosa*:  $r = 0.006$ ,  $P = 0.508$ ; *G. gemineoa*:  $r = 0.212$ ,  $P = 0.058$ ).

306 To further check whether species remain genetically isolated in sympatry, we compared mean  
307 species-level  $F_{ST}$  between sympatric and allopatric populations (Figure S3). No difference was  
308 detected ( $F_{ST}$  in sympatry:  $0.599 \pm 0.009$ ;  $F_{ST}$  in allopatry:  $0.598 \pm 0.001$ ;  $F_{(1, 85)} = 0.015$ ,  $P = 0.903$ ),  
309 suggesting that species barriers persist even when geographical barriers are absent.

310

311 **Genetic isolation by temperature.** Mantel tests also failed to detect an association between pairwise  
312 genetic distance and distance in thermal environment for either species (*G. caespitosa*:  $r = -0.119$ ,  $P =$   
313  $0.692$ ; *G. gemineoa*:  $r = 0.003$ ,  $P = 0.462$ ).

314 *Analyses of climate adaptation and vulnerability*

315 **Candidate loci for thermal adaptation.** Redundancy analyses identified significant associations  
316 between individual loci and temperature variables that explained  $\sim 2\%$  of multilocus genetic variation  
317 and supported thermal adaptation in each species (*G. caespitosa*: adjusted  $R^2$  of global model =  $0.021$ ,  
318  $P < 0.002$ ; *G. gemineoa*: adjusted  $R^2$  of global model =  $0.020$ ,  $P < 0.002$ ). Multiple, independent  
319 associations were inferred by the significance of all four ordination axes per analysis ( $P < 0.002$ ),  
320 with the two largest axes jointly capturing 53% of associations detected in *G. caespitosa* and 56% of  
321 associations detected in *G. gemineoa* (Figure 2). Of 775 candidate loci detected in *G. caespitosa*  
322 (from 15,636 loci screened), 181 were most associated with mean temperature, 230 were most  
323 associated with maximum temperature, 213 were most associated with monthly temperature range,  
324 and 151 were most associated with temperature noise structure (Table S4). Association strengths

325 (measured as correlations) averaged 0.354 and ranged from 0.077 to 0.769. Of 679 candidate loci  
326 detected in *G. gemineoa* (from 15,462 loci screened), 248 were most associated with mean  
327 temperature, 93 were most associated with maximum temperature, 173 were most associated with  
328 monthly temperature range, and 165 were most associated with temperature noise structure (Figure 2;  
329 Table S4). Association strengths averaged 0.311 and ranged from 0.081 to 0.856.

330 BayPass analyses also identified multiple candidate loci associated with temperature variables,  
331 some of which overlapped those identified by redundancy analyses (Figure 3, top row), and did so for  
332 specific variables (Table S4). Robust candidates identified by both methods were used to further  
333 predict genomic vulnerability (see Figures 4 and 5). Few candidates overlapped between species  
334 (Figure 3, bottom row), which seemingly adapt to temperature using mostly different loci. Overlaps  
335 were generally higher than expected by chance ( $P < 0.001$ ), except for the overlap between species  
336 resulting from redundancy analyses (Figure 3, bottom row).

337 Other cross-validations further supported the robustness of our results. Patterns in Figure 2 were  
338 similar to those from an equivalent analysis that included Moran's eigenvector maps to account for  
339 population structure in *G. gemineoa* (the only species for which genetic isolation was marginally  
340 associated with distance), with many overlapping SNPs (Table S5).

341 **Genomic vulnerability to future climate change.** Gradient forest models identified temperature-  
342 driven turnover in allele frequencies at 11 candidate loci in *G. caespitosa* (from 24 candidates  
343 screened), and 10 candidate loci in *G. gemineoa* (from 17 candidates screened) (Figure S5). Based on  
344 the relative contributions of temperature variables to predicted turnover (indicated by the lengths and  
345 alignments of vectors with biplot axes in Figure 4; see also importance values in Figure S6),  
346 maximum temperature and temperature noise structure are most important to turnover in *G.*  
347 *caespitosa*, whereas mean temperature and monthly temperature range are most important to turnover  
348 in *G. gemineoa*. Importance aside, the close alignments of their vectors in both biplots suggest that  
349 temperature range and noise structure otherwise act similarly on turnover in both species (Figure 4).

350 Mapping current genetic turnover for both species identified divergent patterns of adaptive genetic  
351 composition along the open coast (Figure 4). For *G. caespitosa*, predicted allele frequencies were

352 relatively homogeneous (Figure 4B), apart from turnover between western populations and the sole  
353 northeastern sample mapping to changes in maximum and mean temperature (higher in bluer and  
354 purple regions respectively). For *G. gemineoa* predicted allele frequencies were more heterogeneous  
355 (Figure 4D), with turnover between western populations and (mostly) allopatric ones in the northeast  
356 mapping to changes in temperature range and mean (higher in greener and bluer regions respectively).  
357 For both species, marked turnover between the open coast and enclosed bays mapped to changes in  
358 temperature range and noise structure (both higher within bays).

359 Not surprisingly, more extreme warming (RCP45 *versus* RCP85 and 2050 *versus* 2100 scenarios)  
360 is predicted to increase divergence between current and future genetic compositions, and hence the  
361 genetic offset needed to maintain thermal adaptation, in both species (Figure 5). For *G. caespitosa*,  
362 greatest offset is predicted for enclosed bays and the northeast coast, unless extreme warming to 2100  
363 demands adaptation throughout its range (Figure 5A). For *G. gemineoa*, genetic offset is more than  
364 double the magnitude predicted for *G. caespitosa*, and is greatest for western (sympatric) populations  
365 — again, unless extreme warming to 2100 demands adaptation throughout its range (Figure 5B).

366

## 367 **Discussion**

368 With climate change redistributing biodiversity around the globe (Pechl et al., 2017), predicting  
369 species' responses to future climates entails understanding their current ranges, whether they harbour  
370 or share genetic variants involved in climate adaptation, and how variants are distributed across  
371 landscapes and seascapes undergoing climate change. We set out to assess the distribution of neutral  
372 and adaptive genomic variation in sister foundation species — the marine tubeworms *G. gemineoa*  
373 and *G. caespitosa* — across a sentinel region for climate impacts. We found that species hybridize  
374 little despite uncovering sympatry in their ranges, harbour mainly species-specific variants involved in  
375 adaptation to differing components of temperature, and face different risks of maladaptation under  
376 projected changes in temperature. These results offer new insights into the potential disruption of  
377 evolutionary adaptation and species distributions by near-future climate change in coastal ecosystems.

378        Detection of sympatry in sister *Galeolaria* species overturns previous molecular support for  
379        limited overlap in their ranges (Halt et al., 2009; Styan et al., 2008), but accords with their capacity  
380        for long-distance dispersal in early life (Olsen et al., 2020; Palumbi, 1994). Notably, the extent of  
381        range overlap detected here far exceeds estimates of poleward range shifts by marine species in the  
382        hotspot during the last decade (Sunday et al., 2015). Our results could therefore reflect more intensive  
383        sequencing across the hotspot here than in previous work. Moreover, that species show little gene  
384        flow in sympatry suggests the presence of strong reproductive barriers between them, despite  
385        maintaining a reasonable capacity to cross-fertilise and produce viable larvae (Styan et al., 2008). It is  
386        therefore possible that species in sympatry remain isolated by genetic incompatibilities arising at later  
387        postzygotic stages (Fierst & Hansen, 2010; Sinervo & Calsbeek, 2003), or other mechanisms (e.g.,  
388        asynchronous gamete release, conspecific sperm precedence; Howard, 1999; Lotterhos & Levitan,  
389        2010) that avoid hybridisation in the first place, and such possibilities warrant further research. Last,  
390        neutral genomic variation revealed low levels of population differentiation and moderate levels of  
391        inbreeding in both species, as seems to be common for external fertilisers with long-distance dispersal  
392        and limited control of mate choice (Olsen et al., 2020; Palumbi, 1994). However, other measures of  
393        neutral diversity were lower in *G. gemineoa* than *G. caespitosa*, suggesting that species-specific  
394        reductions in population size may have left one species more genetically depauperate, and hence more  
395        vulnerable to decline, than the other (Reed & Frankham, 2003; Sgrò et al., 2011).

396        Climate adaptation also seems to differ between *Galeolaria* species, given that putatively-  
397        adaptive loci show species-specific associations with different components of temperature —  
398        specifically, with its maximum and stochasticity for *G. caespitosa*, but its mean and range for *G.*  
399        *gemineoa*. Australia's east coast is characterized by clear latitudinal gradients in the annual mean and  
400        seasonality of temperature driven by seasonal cycling of the East Australian Current, whereas the  
401        south coast is characterised by less-structured changes in temperature occurring longitudinally  
402        (Frusher et al., 2014; Waters, 2008). Hence, adaptive genetic variation in *G. gemineoa* (whose range  
403        extends northward along the east coast) associates most strongly with the dominant components of  
404        temperature variation throughout its range, as does adaptive variation in *G. caespitosa* (whose range is



405 largely restricted to the south coast). This result emphasises the expected coupling of physical  
406 processes (e.g., oceanographic forcing) and evolutionary processes in the sea (Lotterhos et al., 2021),  
407 also detected in the handful of studies to so far link adaptive variants to physical characteristics of  
408 coastal ecosystems (Nielsen et al., 2021; Vranken et al., 2021; Wood et al., 2021). It may further  
409 suggest that sister *Galeolaria* species have adapted to different selective pressures mediated by  
410 different components of temperature variation, facilitating poleward range shifts in *G. gemineoa*,  
411 especially, if conditions to which it has already adapted on the east coast extend southward with  
412 ongoing climate change.

413 Another possibility is that *Galeolaria* species have adapted to similar components of temperature  
414 variation, but differ in the genetic basis of adaptation in ways that affect power to detect associations  
415 between adaptive variants and those components. Supporting this idea, adaptation in both species is  
416 polygenic and involves loci that not only associate with different components of temperature to  
417 different degrees within species, but also overlap little between species. On one hand, this could  
418 reflect the multidimensional nature of climatic variables (Garcia et al., 2014; Waldock et al., 2018) if  
419 their different components drive selection at different genomic regions. Future studies could therefore  
420 assess whether putatively-adaptive loci are functionally associated with different traits that aid  
421 adaptation (e.g., Popovic & Riginos 2020), for example, to changes in mean temperature *versus*  
422 stochasticity in temperature. On the other hand, genetic differentiation of populations and species  
423 across the southeast hotspot is often attributed to their historical isolation during glacial maxima  
424 (Dawson, 2005; O'Hara & Poore, 2000). Consequently, *Galeolaria* species may have diverged  
425 genetically long before adapting to contemporary climates, and the relative contributions of isolation  
426 and adaptation to divergence in these (and other) lineages across the hotspot are currently hard to  
427 elucidate (Miller et al., 2013; Waters, 2008). Climate adaptation is nonetheless cited as a key driver of  
428 divergence in other local species (Miller et al., 2020; Wood et al., 2021). If such is also the case for  
429 *Galeolaria*, then barriers between sister species could be maintained by genetic incompatibilities  
430 arising from divergent adaptation (Dettman et al., 2007; Keller & Seehausen, 2012), in addition to the  
431 neutral divergence noted above. The nature and origin of these barriers, however, remains to be tested.

432 Mapping genomic vulnerability to future climate change across the hotspot predicts that *G.*  
433 *gemineoa* is substantially more vulnerable than *G. caespitosa*, generally needing twice as much  
434 genomic change to track climate change via evolutionary adaptation (Capblancq et al., 2020;  
435 Hoffmann et al., 2021). This may be due *G. gemineoa*'s distribution across a broad thermal gradient  
436 in the hotspot, leading to greater breadth of adaptation, and hence greater potential for future loss of  
437 adaptation in this species compared to *G. caespitosa*. Vulnerability also varied geographically within  
438 species, with higher levels predicted for populations approaching the northern edge of *G. caespitosa*'s  
439 range, and those approaching the western edge of *G. gemineoa*'s range (though we cannot rule out its  
440 extension further west than sampled). Compared to populations at range cores, range-edge  
441 populations often harbour novel genetic variants that can facilitate adaptation, but may also have  
442 higher risks of decline due to smaller population sizes and lower genetic diversity (Eckert et al., 2008;  
443 Polechová & Barton, 2015; Sexton et al., 2009). Our predictions of vulnerability may therefore flag  
444 potential range contractions in both species under future climate change, with *G. gemineoa* at  
445 comparatively greater risk due to its lower genetic diversity noted above. Last, *G. caespitosa* is  
446 predicted to have relatively high vulnerability in enclosed bays, marked by less flow and more  
447 extreme temperatures compared to open coasts (Barton et al. 2012). Hence, the relatively strong  
448 signals of climate adaptation detected in bays, shown here to harbour different adaptive variants to  
449 those found on nearby coasts, may also be prone to disruption under future climate change.

450 Despite their promise for inferring climate adaptation (and its predicted loss) in non-model  
451 organisms with limited tractability to experimentation (Fitzpatrick et al., 2021), the genomic tools  
452 used here have limitations that should be acknowledged (reviewed in Capblancq et al., 2020;  
453 Hoffmann et al., 2021; Rellstab et al., 2021). For instance, predictions of genomic vulnerability do not  
454 account for the ability of populations to adapt to climate change using standing genetic variation, or  
455 gene flow from other, well-adapted populations across a species' range (which, as noted, could  
456 especially benefit *G. gemineoa*). Genotype-environment associations are also inherently correlative,  
457 and can be prone to false positives (Hoban et al., 2016; Rellstab et al., 2015; Tiffin & Ross-Ibarra,  
458 2014), although we cross-validated adaptive candidates using multiple approaches here.

459 Notwithstanding such limitations, using genotype-environment associations to predict genomic  
460 vulnerability may point out populations requiring greater adaptation to track future climates, given  
461 that inherent costs of adaptation are expected to impose demographic pressure on populations while  
462 they adapt to projected changes (Bell, 2012; Haldane, 1957). For any focal organism, future studies  
463 should ideally aim to link putatively-adaptive genetic variants to variation in individual phenotypes  
464 and fitness, in addition to population growth and adaptive capacity, in order to improve and validate  
465 predictions of genomic vulnerability under climate change.

466 Overall, we present new insights into climate adaptation, its predicted disruption by climate  
467 change, and the implications for partly sympatric foundation species that enhance biodiversity in a  
468 sentinel region for climate change impacts. Identifying so-called evolutionarily significant units worth  
469 conserving for their genetic uniqueness, adaptive significance, and risk of decline, is one of the most  
470 pressing challenges facing us today, and a necessary step in developing proactive conservation  
471 strategies (Foden et al., 2019; Smith et al., 2014; Willi et al., 2022). Our findings advance that goal by  
472 identifying sister *Galeolaria* species as lineages on distinct adaptive trajectories linked to climate, that  
473 seemingly share little gene flow (and hence little scope to gain neutral diversity or climate-adaptive  
474 variants from one another), and are predicted to fare differently in future climates. As foundation  
475 species, moreover, future changes in either of their distributions will likely cascade to broader impacts  
476 on the biological communities they sustain (Thomsen et al., 2022). In this context, studies such as  
477 ours could enhance the holistic assessment of species vulnerability to climate change (Hoffmann et  
478 al., 2015; Williams et al., 2008), and contribute to the evolutionarily enlightened management of  
479 biodiversity in coastal ecosystems.

480 **References**

- 481 Alexander, D. H., Novembre, J., & Lange, K. (2009). Fast model-based estimation of ancestry in  
482 unrelated individuals. *Genome Research*, *19*(9), 1655–1664.  
483 <https://doi.org/10.1101/gr.094052.109>
- 484 Assis, J., Tyberghein, L., Bosch, S., Verbruggen, H., Serrão, E. A., & Clerck, O. D. (2018). Bio-  
485 ORACLE v2.0: Extending marine data layers for bioclimatic modelling. *Global Ecology and*  
486 *Biogeography*, *27*(3), 277–284. <https://doi.org/10.1111/geb.12693>
- 487 Barton J, Pope A, and S Howe (2012) Marine Natural Values Study Vol 2: Marine Protected Areas of  
488 the Central Victoria Bioregion. Parks Victoria Technical Series No. 76. Parks Victoria,  
489 Melbourne.
- 490 Bay, R. A., Harrigan, R. J., Underwood, V. L., Gibbs, H. L., Smith, T. B., & Ruegg, K. (2018).  
491 Genomic signals of selection predict climate-driven population declines in a migratory bird.  
492 *Science*, *359*(6371), 83–86. <https://doi.org/10.1126/science.aan4380>
- 493 Bell, G. (2012). Evolutionary rescue and the limits of adaptation. *Philosophical Transactions of the*  
494 *Royal Society B: Biological Sciences*, *368*(1610), 20120080–20120080.  
495 <https://doi.org/10.1098/rstb.2012.0080>
- 496 Bitter, M. C., Wong, J. M., Dam, H. G., Donelan, S. C., Kenkel, C. D., Komoroske, L. M., Nickols,  
497 K. J., Rivest, E. B., Salinas, S., Burgess, S. C., & Lotterhos, K. E. (2021). Fluctuating  
498 selection and global change: A synthesis and review on disentangling the roles of climate  
499 amplitude, predictability and novelty. *Proceedings of the Royal Society B: Biological*  
500 *Sciences*, *288*(1957), 20210727. <https://doi.org/10.1098/rspb.2021.0727>
- 501 Borrell, J. S., Zohren, J., Nichols, R. A., & Buggs, R. J. A. (2020). Genomic assessment of local  
502 adaptation in dwarf birch to inform assisted gene flow. *Evolutionary Applications*, *13*(1),  
503 161–175. <https://doi.org/10.1111/eva.12883>
- 504 Capblancq, T., Fitzpatrick, M. C., Bay, R. A., Exposito-Alonso, M., & Keller, S. R. (2020). Genomic  
505 Prediction of (Mal)Adaptation Across Current and Future Climatic Landscapes. *Annual*

- 506 *Review of Ecology, Evolution, and Systematics*, 51(1), 245–269.  
507 <https://doi.org/10.1146/annurev-ecolsys-020720-042553>
- 508 Catchen, J., Hohenlohe, P. A., Bassham, S., Amores, A., & Cresko, W. A. (2013). Stacks: An analysis  
509 tool set for population genomics. *Molecular Ecology*, 22(11), 3124–3140.  
510 <https://doi.org/10.1111/mec.12354>
- 511 Catchen, J. M., Amores, A., Hohenlohe, P., Cresko, W., & Postlethwait, J. H. (2011). Stacks:  
512 Building and genotyping Loci de novo from short-read sequences. *G3 (Bethesda, Md.)*, 1(3),  
513 171–182. <https://doi.org/10.1534/g3.111.000240>
- 514 Chirgwin, E., Connallon, T., & Monro, K. (2021). The thermal environment at fertilization mediates  
515 adaptive potential in the sea. *Evolution Letters*, 5(2), 154–163.  
516 <https://doi.org/10.1002/evl3.215>
- 517 Chirgwin, E., Marshall, D. J., & Monro, K. (2020). Physical and physiological impacts of ocean  
518 warming alter phenotypic selection on sperm morphology. *Functional Ecology*, 34(3), 646–  
519 657. <https://doi.org/10.1111/1365-2435.13483>
- 520 Dahlke, F. T., Wohlrab, S., Butzin, M., & Pörtner, H.-O. (2020). Thermal bottlenecks in the life cycle  
521 define climate vulnerability of fish. *Science*. <https://doi.org/10.1126/science.aaz3658>
- 522 Dawson, M. N. (2005). Incipient speciation of *Catostylus mosaicus* (Scyphozoa, Rhizostomeae,  
523 Catostylidae), comparative phylogeography and biogeography in south-east Australia.  
524 *Journal of Biogeography*, 32(3), 515–533. <https://doi.org/10.1111/j.1365-2699.2004.01193.x>
- 525 Dettman, J. R., Sirjusingh, C., Kohn, L. M., & Anderson, J. B. (2007). Incipient speciation by  
526 divergent adaptation and antagonistic epistasis in yeast. *Nature*, 447(7144), 585–588.  
527 <https://doi.org/10.1038/nature05856>
- 528 Dray, S., & Dufour, A.-B. (2007). The ade 4 Package: Implementing the Duality Diagram for  
529 Ecologists. *Journal of Statistical Software*, 22(4). <https://doi.org/10.18637/jss.v022.i04>
- 530 Eckert, C. G., Samis, K. E., & Loughheed, S. C. (2008). Genetic variation across species' geographical  
531 ranges: The central–marginal hypothesis and beyond. *Molecular Ecology*, 17(5), 1170–1188.  
532 <https://doi.org/10.1111/j.1365-294X.2007.03659.x>

- 533 Ellis, N., Smith, S. J., & Pitcher, C. R. (2012). Gradient forests: Calculating importance gradients on  
534 physical predictors. *Ecology*, *93*(1), 156–168. <https://doi.org/10.1890/11-0252.1>
- 535 Fick, S. E., & Hijmans, R. J. (2017). WorldClim 2: New 1-km spatial resolution climate surfaces for  
536 global land areas. *International Journal of Climatology*, *37*(12), 4302–4315.  
537 <https://doi.org/10.1002/joc.5086>
- 538 Fierst, J. L., & Hansen, T. F. (2010). Genetic Architecture and Postzygotic Reproductive Isolation:  
539 Evolution of Bateson–Dobzhansky–Muller Incompatibilities in a Polygenic Model. *Evolution*,  
540 *64*(3), 675–693. <https://doi.org/10.1111/j.1558-5646.2009.00861.x>
- 541 Fischer, E. M., & Knutti, R. (2015). Anthropogenic contribution to global occurrence of heavy-  
542 precipitation and high-temperature extremes. *Nature Climate Change*, *5*(6), 560–564.  
543 <https://doi.org/10.1038/nclimate2617>
- 544 Fitzpatrick, M. C., Chhatre, V. E., Soolanayakanahally, R. Y., & Keller, S. R. (2021). Experimental  
545 support for genomic prediction of climate maladaptation using the machine learning approach  
546 Gradient Forests. *Molecular Ecology Resources*, *21*(8), 2749–2765.  
547 <https://doi.org/10.1111/1755-0998.13374>
- 548 Fitzpatrick, M. C., & Keller, S. R. (2015). Ecological genomics meets community-level modelling of  
549 biodiversity: Mapping the genomic landscape of current and future environmental adaptation.  
550 *Ecology Letters*, *18*(1), 1–16. <https://doi.org/10.1111/ele.12376>
- 551 Fitzpatrick, S. W., Bradburd, G. S., Kremer, C. T., Salerno, P. E., Angeloni, L. M., & Funk, W. C.  
552 (2020). Genomic and Fitness Consequences of Genetic Rescue in Wild Populations. *Current*  
553 *Biology*, *30*(3), 517–522.e5. <https://doi.org/10.1016/j.cub.2019.11.062>
- 554 Foden, W. B., Young, B. E., Akçakaya, H. R., Garcia, R. A., Hoffmann, A. A., Stein, B. A., Thomas,  
555 C. D., Wheatley, C. J., Bickford, D., Carr, J. A., Hole, D. G., Martin, T. G., Pacifici, M.,  
556 Pearce-Higgins, J. W., Platts, P. J., Visconti, P., Watson, J. E. M., & Huntley, B. (2019).  
557 Climate change vulnerability assessment of species. *WIREs Climate Change*, *10*(1), e551.  
558 <https://doi.org/10.1002/wcc.551>

- 559 Forester, B. R., Jones, M. R., Joost, S., Landguth, E. L., & Lasky, J. R. (2016). Detecting spatial  
560 genetic signatures of local adaptation in heterogeneous landscapes. *Molecular Ecology*, *25*(1),  
561 104–120. <https://doi.org/10.1111/mec.13476>
- 562 Forester, B. R., Lasky, J. R., Wagner, H. H., & Urban, D. L. (2018). Comparing methods for detecting  
563 multilocus adaptation with multivariate genotype-environment associations. *Molecular*  
564 *Ecology*, *27*(9), 2215–2233. <https://doi.org/10.1111/mec.14584>
- 565 Frankham, R. (2015). Genetic rescue of small inbred populations: Meta-analysis reveals large and  
566 consistent benefits of gene flow. *Molecular Ecology*, *24*(11), 2610–2618.  
567 <https://doi.org/10.1111/mec.13139>
- 568 Frusher, S. D., Hobday, A. J., Jennings, S. M., Creighton, C., D’Silva, D., Haward, M., Holbrook, N.  
569 J., Nursey-Bray, M., Pecl, G. T., & van Putten, E. I. (2014). The short history of research in a  
570 marine climate change hotspot: From anecdote to adaptation in south-east Australia. *Reviews*  
571 *in Fish Biology and Fisheries*, *24*(2), 593–611. <https://doi.org/10.1007/s11160-013-9325-7>
- 572 Garcia, R. A., Cabeza, M., Rahbek, C., & Araújo, M. B. (2014). Multiple dimensions of climate  
573 change and their implications for biodiversity. *Science*, *344*(6183), 1–31.  
574 <https://doi.org/10.1126/science.1247579>
- 575 Gautier, M. (2015). Genome-Wide Scan for Adaptive Divergence and Association with Population-  
576 Specific Covariates. *Genetics*, *201*(4), 1555–1579.  
577 <https://doi.org/10.1534/genetics.115.181453>
- 578 Gaylord, B., & Gaines, S. D. (2000). Temperature or Transport? Range Limits in Marine Species  
579 Mediated Solely by Flow. *The American Naturalist*, *155*(6), 769–789.  
580 <https://doi.org/10.1086/303357>
- 581 Goudet, J., & Jombart, T. (2015). *hierfstat: Estimation and Tests of Hierarchical F-Statistics* (R  
582 package version 0.04-22.). <https://CRAN.R-project.org/package=hierfstat>
- 583 Grant, P. R., & Grant, B. R. (2019). Hybridization increases population variation during adaptive  
584 radiation. *Proceedings of the National Academy of Sciences*, *116*(46), 23216–23224.  
585 <https://doi.org/10.1073/pnas.1913534116>

- 586 Gruber, B., & Georges, A. (2019). *DartR: Importing and Analysing SNP and Silicodart Data*  
587 *Generated by Genome-Wide Restriction Fragment Analysis* (R package version 1.1.11).  
588 <https://CRAN.R-project.org/package=dartR>
- 589 Grummer, J. A., Beheregaray, L. B., Bernatchez, L., Hand, B. K., Luikart, G., Narum, S. R., &  
590 Taylor, E. B. (2019). Aquatic Landscape Genomics and Environmental Effects on Genetic  
591 Variation. *Trends in Ecology and Evolution*, *34*(7), 641–654.  
592 <https://doi.org/10.1016/j.tree.2019.02.013>
- 593 Haldane, J. (1957). The cost of natural selection. *Journal of Genetics*, *55*, 511–524.
- 594 Halt, M. N., Kupriyanova, E. K., Cooper, S. J. B., & Rouse, G. W. (2009). Naming species with no  
595 morphological indicators: Species status of *Galeolaria caespitosa* (Annelida: Serpulidae)  
596 inferred from nuclear and mitochondrial gene sequences and morphology. *Invertebrate*  
597 *Systematics*, *23*(3), 205–222. <https://doi.org/10.1071/IS09003>
- 598 Hijmans, R. J. (2017). *Raster: Geographic data analysis and modeling*. [https://CRAN.R-proje](https://CRAN.R-project.org/package=raster)  
599 [ct.org/packa ge=raster](https://CRAN.R-project.org/package=raster)
- 600 Hijmans, R. J., Cameron, S. E., Parra, J. L., Jones, P. G., & Jarvis, A. (2005). Very high resolution  
601 interpolated climate surfaces for global land areas. *International Journal of Climatology*,  
602 *25*(15), 1965–1978. <https://doi.org/10.1002/joc.1276>
- 603 Hijmans, R. J., Williams, E., Vennes, C., & Hijmans, M. R. J. (2017). Package ‘geosphere’. *Spherical*  
604 *Trigonometry*, *1*(7).
- 605 Hill, J. K., Griffiths, H. M., & Thomas, C. D. (2011). Climate Change and Evolutionary Adaptations  
606 at Species’ Range Margins. *Annual Review of Entomology*, *56*(1), 143–159.  
607 <https://doi.org/10.1146/annurev-ento-120709-144746>
- 608 Hoban, S., Kelley, J. L., Lotterhos, K. E., Antolin, M. F., Bradburd, G., Lowry, D. B., Poss, M. L.,  
609 Reed, L. K., Storfer, A., & Whitlock, M. C. (2016). Finding the Genomic Basis of Local  
610 Adaptation: Pitfalls, Practical Solutions, and Future Directions. *The American Naturalist*,  
611 *188*(4), 379–397. <https://doi.org/10.1086/688018>
- 612 Hobday, A. J., & Lough, J. M. (2011). Projected climate change in Australian marine and freshwater  
613 environments. *Marine and Freshwater Research*, *62*, 1000–1014.



- 614 Hobday, A. J., & Pecl, G. T. (2014). Identification of global marine hotspots: Sentinels for change and  
615 vanguards for adaptation action. *Reviews in Fish Biology and Fisheries*, 24(2), 415–425.  
616 <https://doi.org/10.1007/s11160-013-9326-6>
- 617 Hoffmann, A. A., & Sgrò, C. M. (2011). Climate change and evolutionary adaptation. *Nature*,  
618 470(7335), 479–485. <https://doi.org/10.1038/nature09670>
- 619 Hoffmann, A. A., Weeks, A. R., & Sgrò, C. M. (2021). Opportunities and challenges in assessing  
620 climate change vulnerability through genomics. *Cell*, 184(6), 1420–1425.  
621 <https://doi.org/10.1016/j.cell.2021.02.006>
- 622 Hoffmann, A., Griffin, P., Dillon, S., Catullo, R., Rane, R., Byrne, M., Jordan, R., Oakeshott, J.,  
623 Weeks, A., Joseph, L., Lockhart, P., Borevitz, J., & Sgrò, C. (2015). A framework for  
624 incorporating evolutionary genomics into biodiversity conservation and management. *Climate*  
625 *Change Responses*, 2(1), 1. <https://doi.org/10.1186/s40665-014-0009-x>
- 626 Hohenlohe, P. A., Funk, W. C., & Rajora, O. P. (2021). Population genomics for wildlife conservation  
627 and management. *Molecular Ecology*, 30(1), 62–82. <https://doi.org/10.1111/mec.15720>
- 628 Howard, D. J. (1999). Conspecific Sperm and Pollen Precedence and Speciation. *Annual Review of*  
629 *Ecology and Systematics*, 30(1), 109–132. <https://doi.org/10.1146/annurev.ecolsys.30.1.109>
- 630 Ingvarsson, P. K., & Bernhardsson, C. (2020). Genome-wide signatures of environmental adaptation  
631 in European aspen (*Populus tremula*) under current and future climate conditions.  
632 *Evolutionary Applications*, 13(1), 132–142. <https://doi.org/10.1111/eva.12792>
- 633 Jia, K.-H., Zhao, W., Maier, P. A., Hu, X.-G., Jin, Y., Zhou, S.-S., Jiao, S.-Q., El-Kassaby, Y. A.,  
634 Wang, T., Wang, X.-R., & Mao, J.-F. (2020). Landscape genomics predicts climate change-  
635 related genetic offset for the widespread *Platyclusus orientalis* (Cupressaceae). *Evolutionary*  
636 *Applications*, 13(4), 665–676. <https://doi.org/10.1111/eva.12891>
- 637 Jombart, T. (2008). adegenet: A R package for the multivariate analysis of genetic markers.  
638 *Bioinformatics*, 24(11), 1403–1405. <https://doi.org/10.1093/bioinformatics/btn129>
- 639 Kardos, M., Armstrong, E. E., Fitzpatrick, S. W., Hauser, S., Hedrick, P. W., Miller, J. M., Tallmon,  
640 D. A., & Funk, W. C. (2021). The crucial role of genome-wide genetic variation in

- 641 conservation. *Proceedings of the National Academy of Sciences*, 118(48).  
642 <https://doi.org/10.1073/pnas.2104642118>
- 643 Keller, I., & Seehausen, O. (2012). Thermal adaptation and ecological speciation. *Molecular Ecology*,  
644 21(4), 782–799. <https://doi.org/10.1111/j.1365-294X.2011.05397.x>
- 645 Kingsolver, J. G., & Buckley, L. B. (2017). Quantifying thermal extremes and biological variation to  
646 predict evolutionary responses to changing climate. *Philosophical Transactions of the Royal  
647 Society B: Biological Sciences*, 372(1723). <https://doi.org/10.1098/rstb.2016.0147>
- 648 Knaus, B. J., & Grünwald, N. J. (2017). vcfr: A package to manipulate and visualize variant call  
649 format data in R. *Molecular Ecology Resources*, 17(1), 44–53. [https://doi.org/10.1111/1755-  
650 0998.12549](https://doi.org/10.1111/1755-0998.12549)
- 651 Lande, R. (2014). Evolution of phenotypic plasticity and environmental tolerance of a labile  
652 quantitative character in a fluctuating environment. *Journal of Evolutionary Biology*, 27(5),  
653 866–875. <https://doi.org/10.1111/jeb.12360>
- 654 Liggins, L., Treml, E. A., & Riginos, C. (2020). Seascape Genomics: Contextualizing Adaptive and  
655 Neutral Genomic Variation in the Ocean Environment. In M. F. Oleksiak & O. P. Rajora  
656 (Eds.), *Population Genomics: Marine Organisms* (pp. 171–218). Springer International  
657 Publishing. [https://doi.org/10.1007/13836\\_2019\\_68](https://doi.org/10.1007/13836_2019_68)
- 658 Lotterhos, K. E., Albecker, M., & Trussell, G. C. (2021). Evolution in changing seas. *Proceedings of  
659 the Royal Society B: Biological Sciences*, 288(1965), 20212443.  
660 <https://doi.org/10.1098/rspb.2021.2443>
- 661 Lotterhos, K. E., & Levitan, D. R. (2010). Gamete Release and Spawning Behavior in Broadcast  
662 Spawning Marine Invertebrates. In *The evolution of primary sexual characters in animals*  
663 (eds. J.L. Leonard & A. Córdoba-Aguilar, pp. 99–120). Oxford University Press.
- 664 Miller, A. D., Coleman, M. A., Clark, J., Cook, R., Naga, Z., Doblin, M. A., Hoffmann, A. A.,  
665 Sherman, C. D. H., & Bellgrove, A. (2020). Local thermal adaptation and limited gene flow  
666 constrain future climate responses of a marine ecosystem engineer. *Evolutionary  
667 Applications*, 13(5), 918–934. <https://doi.org/10.1111/eva.12909>

- 668 Miller, A. D., Versace, V. L., Matthews, T. G., Montgomery, S., & Bowie, K. C. (2013). Ocean  
669 currents influence the genetic structure of an intertidal mollusc in southeastern Australia—  
670 Implications for predicting the movement of passive dispersers across a marine biogeographic  
671 barrier. *Ecology and Evolution*, 3(5), 1248–1261. <https://doi.org/10.1002/ece3.535>
- 672 Mitchell, N., Owens, G. L., Hovick, S. M., Rieseberg, L. H., & Whitney, K. D. (2019). Hybridization  
673 speeds adaptive evolution in an eight-year field experiment. *Scientific Reports*, 9(1), 6746.  
674 <https://doi.org/10.1038/s41598-019-43119-4>
- 675 Nazareno, A. G., Bemmels, J. B., Dick, C. W., & Lohmann, L. G. (2017). Minimum sample sizes for  
676 population genomics: An empirical study from an Amazonian plant species. *Molecular*  
677 *Ecology Resources*, 17(6), 1136–1147. <https://doi.org/10.1111/1755-0998.12654>
- 678 Nielsen, E. S., Henriques, R., Beger, M., & von der Heyden, S. (2021). Distinct interspecific and  
679 intraspecific vulnerability of coastal species to global change. *Global Change Biology*,  
680 27(15), 3415–3431. <https://doi.org/10.1111/gcb.15651>
- 681 O’Hara, T. D., & Poore, G. C. B. (2000). Patterns of distribution for southern Australian marine  
682 echinoderms and decapods. *Journal of Biogeography*, 27, 1321–1335.  
683 <https://doi.org/10.1046/j.1365-2699.2000.00499.x>
- 684 Oksanen, J., Blanchet, F. G., & Kindt, R. (2016). *Vegan: Community Ecology Package. R package*  
685 *version 2.3-5*.
- 686 Olsen, K. C., Ryan, W. H., Winn, A. A., Kosman, E. T., Moscoso, J. A., Krueger-Hadfield, S. A.,  
687 Burgess, S. C., Carlon, D. B., Grosberg, R. K., Kalisz, S., & Levitan, D. R. (2020). Inbreeding  
688 shapes the evolution of marine invertebrates. *Evolution*, 74(5), 871–882.  
689 <https://doi.org/10.1111/evo.13951>
- 690 Palumbi, S. R. (1994). Genetic Divergence, Reproductive Isolation, and Marine Speciation. *Annual*  
691 *Review of Ecology and Systematics*, 25(1), 547–572.  
692 <https://doi.org/10.1146/annurev.es.25.110194.002555>
- 693 Paris, J. R., Stevens, J. R., & Catchen, J. M. (2017). Lost in parameter space: A road map for stacks.  
694 *Methods in Ecology and Evolution*, 8(10), 1360–1373. [https://doi.org/10.1111/2041-](https://doi.org/10.1111/2041-210X.12775)  
695 [210X.12775](https://doi.org/10.1111/2041-210X.12775)

- 696 Pecl, G. T., Araújo, M. B., Bell, J. D., Blanchard, J., Bonebrake, T. C., Chen, I.-C., Clark, T. D.,  
697 Colwell, R. K., Danielsen, F., Evengård, B., Falconi, L., Ferrier, S., Frusher, S., Garcia, R. A.,  
698 Griffis, R. B., Hobday, A. J., Janion-Scheepers, C., Jarzyna, M. A., Jennings, S., ... Williams,  
699 S. E. (2017). Biodiversity redistribution under climate change: Impacts on ecosystems and  
700 human well-being. *Science*. <https://doi.org/10.1126/science.aai9214>
- 701 Perdry, H., & Dandine-Roulland, C. (2020). *gaston: Genetic Data Handling (QC, GRM, LD, PCA) &*  
702 *Linear Mixed Models*. (R package version 1.5.6.). [https://CRAN.R-](https://CRAN.R-project.org/package=gaston)  
703 [project.org/package=gaston](https://CRAN.R-project.org/package=gaston)
- 704 Pina-Martins, F., Baptista, J., Pappas, G., & Paulo, O. S. (2019). New insights into adaptation and  
705 population structure of cork oak using genotyping by sequencing. *Global Change Biology*,  
706 25(1), 337–350. <https://doi.org/10.1111/gcb.14497>
- 707 Poland, J. A., Brown, P. J., Sorrells, M. E., & Jannink, J. L. (2012). Development of high-density  
708 genetic maps for barley and wheat using a novel two-enzyme genotyping-by-sequencing  
709 approach. *PLoS ONE*, 7(2). <https://doi.org/10.1371/journal.pone.0032253>
- 710 Polechová, J. (2018). Is the sky the limit? On the expansion threshold of a species' range. *PLoS*  
711 *Biology*, 16(6), 1–18. <https://doi.org/10.1371/journal.pbio.2005372>
- 712 Polechová, J., & Barton, N. H. (2015). Limits to adaptation along environmental gradients.  
713 *Proceedings of the National Academy of Sciences*, 112(20), 6401–6406.  
714 <https://doi.org/10.1073/pnas.1421515112>
- 715 Popovic, I., & Riginos, C. (2020). Comparative genomics reveals divergent thermal selection in  
716 warm- and cold-tolerant marine mussels. *Molecular Ecology*, 29(3), 519–535.  
717 <https://doi.org/10.1111/mec.15339>
- 718 Qiagen. (2006). *DNeasy Blood & Tissue Handbook*.
- 719 R Core Team. (2021). *R: A language and environment for statistical computing*. R Foundation for  
720 Statistical Computing. <https://www.R-project.org/>
- 721 Ramírez, F., Afán, I., Davis, L. S., & Chiaradia, A. (2017). Climate impacts on global hot spots of  
722 marine biodiversity. *Science Advances*, 3(2), e1601198.  
723 <https://doi.org/10.1126/sciadv.1601198>

- 724 Rebolledo, A. P., Sgrò, C. M., & Monro, K. (2020). Thermal performance curves reveal shifts in  
725 optima, limits and breadth in early life. *Journal of Experimental Biology*, 223(22).  
726 <https://doi.org/10.1242/jeb.233254>
- 727 Reed, D. H., & Frankham, R. (2003). Correlation between Fitness and Genetic Diversity.  
728 *Conservation Biology*, 17(1), 230–237. <https://doi.org/10.1046/j.1523-1739.2003.01236.x>
- 729 Rellstab, C., Dauphin, B., & Exposito-Alonso, M. (2021). Prospects and limitations of genomic offset  
730 in conservation management. *Evolutionary Applications*, 14(5), 1202–1212.  
731 <https://doi.org/10.1111/eva.13205>
- 732 Rellstab, C., Gugerli, F., Eckert, A. J., Hancock, A. M., & Holderegger, R. (2015). A practical guide  
733 to environmental association analysis in landscape genomics. *Molecular Ecology*, 24(17),  
734 4348–4370. <https://doi.org/10.1111/mec.13322>
- 735 Rescan, M., Grulois, D., Aboud, E. O., Villemereuil, P. de, & Chevin, L.-M. (2021). Predicting  
736 population genetic change in an autocorrelated random environment: Insights from a large  
737 automated experiment. *PLOS Genetics*, 17(6), e1009611.  
738 <https://doi.org/10.1371/journal.pgen.1009611>
- 739 Ridgway, K., & Hill, K. (2009). The East Australian Current. In *A Marine Climate Change Impacts  
740 and Adaptation Report Card for Australia 2009* (p. 17). Eds. E.S. Poloczanska, A.J. Hobday  
741 and A.J. Richardson.
- 742 Ripa, J., & Lundberg, P. (1996). Noise Colour and the Risk of Population Extinctions. *Proceedings of  
743 the Royal Society B: Biological Sciences*, 263(1377), 1751–1753.  
744 <https://doi.org/10.1098/rspb.1996.0256>
- 745 Rochette, N. C., & Catchen, J. M. (2017). Deriving genotypes from RAD-seq short-read data using  
746 Stacks. *Nature Protocols*, 12(12), 2640–2659. <https://doi.org/10.1038/nprot.2017.123>
- 747 Román-Palacios, C., & Wiens, J. J. (2020). Recent responses to climate change reveal the drivers of  
748 species extinction and survival. *Proceedings of the National Academy of Sciences*, 117(8),  
749 201913007. <https://doi.org/10.1073/pnas.1913007117>

- 750 Ruokolainen, L., Lindén, A., Kaitala, V., & Fowler, M. S. (2009). Ecological and evolutionary  
751 dynamics under coloured environmental variation. *Trends in Ecology and Evolution*, 24(10),  
752 555–563. <https://doi.org/10.1016/j.tree.2009.04.009>
- 753 Scheffers, B. R., De Meester, L., Bridge, T. C. L., Hoffmann, A. a, Pandolfi, J. M., Corlett, R. T.,  
754 Butchart, S. H. M., Pearce-Kelly, P., Kovacs, K. M., Dudgeon, D., Pacifici, M., Rondinini, C.,  
755 Foden, W. B., Martin, T. G., Mora, C., Bickford, D., & Watson, J. E. M. (2016). The broad  
756 footprint of climate change from genes to biomes to people. *Science*, 354(6313), 719.  
757 <https://doi.org/10.1126/science.aaf7671>
- 758 Sexton, J. P., McIntyre, P. J., Angert, A. L., & Rice, K. J. (2009). Evolution and Ecology of Species  
759 Range Limits. *Annual Review of Ecology, Evolution, and Systematics*, 40(1), 415–436.  
760 <https://doi.org/10.1146/annurev.ecolsys.110308.120317>
- 761 Sgrò, C. M., Lowe, A. J., & Hoffmann, A. A. (2011). Building evolutionary resilience for conserving  
762 biodiversity under climate change. *Evolutionary Applications*, 4(2), 326–337.  
763 <https://doi.org/10.1111/j.1752-4571.2010.00157.x>
- 764 Sinervo, B., & Calsbeek, R. (2003). Physiological Epistasis, Ontogenetic Conflict and Natural  
765 Selection on Physiology and Life History. *Integrative and Comparative Biology*, 43(3), 419–  
766 430. <https://doi.org/10.1093/icb/43.3.419>
- 767 Smith, T. B., Kinnison, M. T., Strauss, S. Y., Fuller, T. L., & Carroll, S. P. (2014). Prescriptive  
768 Evolution to Conserve and Manage Biodiversity. *Annual Review of Ecology, Evolution, and*  
769 *Systematics*, 45(1), 1–22. <https://doi.org/10.1146/annurev-ecolsys-120213-091747>
- 770 Styan, C. A., Kupriyanova, E., & Havenhand, J. N. (2008). Barriers to cross-fertilization between  
771 populations of a widely dispersed polychaete species are unlikely to have arisen through  
772 gametic compatibility arms-races. *Evolution*, 62(12), 3041–3055.  
773 <https://doi.org/10.1111/j.1558-5646.2008.00521.x>
- 774 Sunday, J. M., Pecl, G. T., Frusher, S., Hobday, A. J., Hill, N., Holbrook, N. J., Edgar, G. J., Stuart-  
775 Smith, R., Barrett, N., Wernberg, T., Watson, R. A., Smale, D. A., Fulton, E. A., Slawinski,  
776 D., Feng, M., Radford, B. T., Thompson, P. A., & Bates, A. E. (2015). Species traits and

- 777 climate velocity explain geographic range shifts in an ocean-warming hotspot. *Ecology*  
778 *Letters*, 18(9), 944–953. <https://doi.org/10.1111/ele.12474>
- 779 Teixeira, J. C., & Huber, C. D. (2021). The inflated significance of neutral genetic diversity in  
780 conservation genetics. *Proceedings of the National Academy of Sciences*, 118(10).  
781 <https://doi.org/10.1073/pnas.2015096118>
- 782 Thomsen, M. S., Altieri, A. H., Angelini, C., Bishop, M. J., Bulleri, F., Farhan, R., Frühling, V. M.  
783 M., Gribben, P. E., Harrison, S. B., He, Q., Klinghardt, M., Langeneck, J., Lanham, B. S.,  
784 Mondardini, L., Mulders, Y., Oleksyn, S., Ramus, A. P., Schiel, D. R., Schneider, T., ... Zotz,  
785 G. (2022). Heterogeneity within and among co-occurring foundation species increases  
786 biodiversity. *Nature Communications*, 13(1), 581. <https://doi.org/10.1038/s41467-022-28194->  
787 [y](https://doi.org/10.1038/s41467-022-28194-y)
- 788 Tiffin, P., & Ross-Ibarra, J. (2014). Advances and limits of using population genetics to understand  
789 local adaptation. *Trends in Ecology & Evolution*, 29(12), 673–680.  
790 <https://doi.org/10.1016/j.tree.2014.10.004>
- 791 Todesco, M., Pascual, M. A., Owens, G. L., Ostevik, K. L., Moyers, B. T., Hübner, S., Heredia, S. M.,  
792 Hahn, M. A., Caseys, C., Bock, D. G., & Rieseberg, L. H. (2016). Hybridization and  
793 extinction. *Evolutionary Applications*, 9(7), 892–908. <https://doi.org/10.1111/eva.12367>
- 794 Tyberghein, L., Verbruggen, H., Pauly, K., Troupin, C., Mineur, F., & Clerck, O. D. (2012). Bio-  
795 ORACLE: A global environmental dataset for marine species distribution modelling. *Global*  
796 *Ecology and Biogeography*, 21(2), 272–281. <https://doi.org/10.1111/j.1466->  
797 [8238.2011.00656.x](https://doi.org/10.1111/j.1466-8238.2011.00656.x)
- 798 Vranken, S., Wernberg, T., Scheben, A., Severn-Ellis, A. A., Batley, J., Bayer, P. E., Edwards, D.,  
799 Wheeler, D., & Coleman, M. A. (2021). Genotype–Environment mismatch of kelp forests  
800 under climate change. *Molecular Ecology*, 30(15), 3730–3746.  
801 <https://doi.org/10.1111/mec.15993>
- 802 Waldock, C., Dornelas, M., & Bates, A. E. (2018). Temperature-Driven Biodiversity Change:  
803 Disentangling Space and Time. *BioScience*, 68(11), 873–884.  
804 <https://doi.org/10.1093/biosci/biy096>

- 805 Waters, J. M. (2008). Marine biogeographical disjunction in temperate Australia: Historical  
806 landbridge, contemporary currents, or both? *Diversity and Distributions*, *14*(4), 692–700.  
807 <https://doi.org/10.1111/j.1472-4642.2008.00481.x>
- 808 Willi, Y., Kristensen, T. N., Sgrò, C. M., Weeks, A. R., Ørsted, M., & Hoffmann, A. A. (2022).  
809 Conservation genetics as a management tool: The five best-supported paradigms to assist the  
810 management of threatened species. *Proceedings of the National Academy of Sciences*, *119*(1).  
811 <https://doi.org/10.1073/pnas.2105076119>
- 812 Williams, S. E., Shoo, L., Isaac, J., Hoffmann, A., & Langham, G. (2008). Towards an integrated  
813 framework for assessing the vulnerability of species to climate change. *PLoS Biology*, *6*(12),  
814 2621–2626. <https://doi.org/10.1371/journal.pbio.0060325>
- 815 Wood, G., Marzinelli, E. M., Campbell, A. H., Steinberg, P. D., Vergés, A., & Coleman, M. A.  
816 (2021). Genomic vulnerability of a dominant seaweed points to future-proofing pathways for  
817 Australia’s underwater forests. *Global Change Biology*, *27*(10), 2200-2212.  
818 <https://doi.org/10.1111/gcb.15534>
- 819 Wright, J. T., & Gribben, P. E. (2017). Disturbance-mediated facilitation by an intertidal ecosystem  
820 engineer. *Ecology*, *98*(9), 2425–2436. <https://doi.org/10.1002/ecy.1932>



821 **Figures**

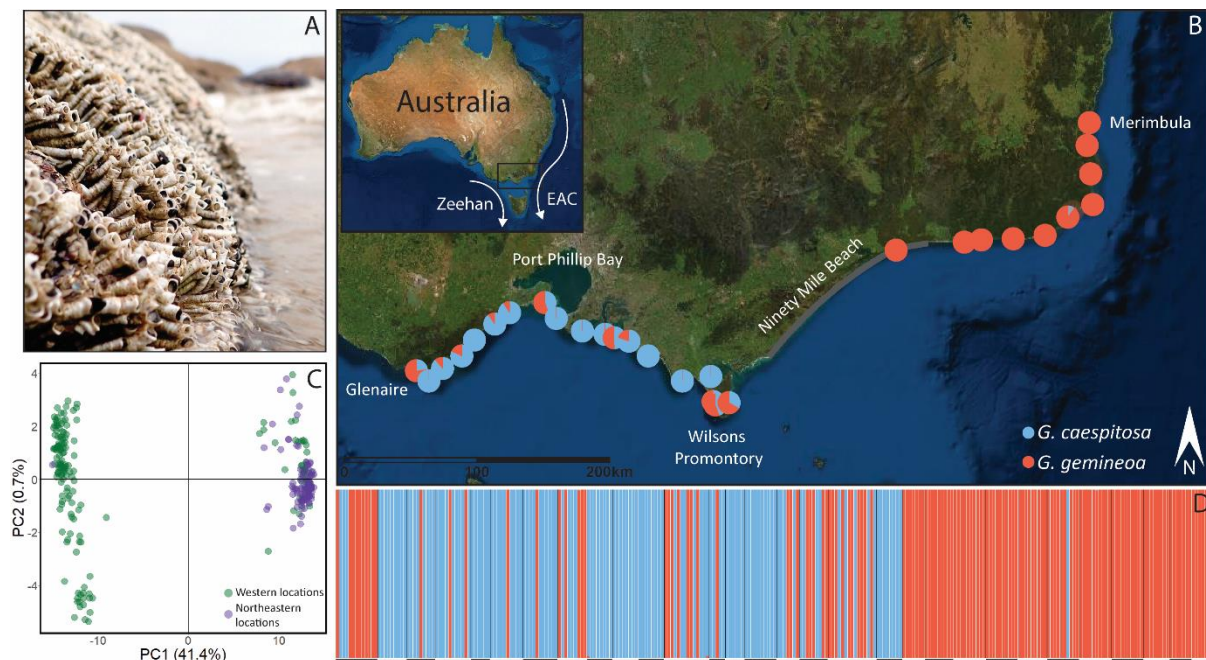

822

823 **Figure 1. Geographic setting and genetic structure of *Galeolaria*.** (A) A typical colony showing  
824 adults retracted into tubes at low tide. (B) Locations from which individuals were sampled across the  
825 southeast hotspot, where boundary currents converge at a now-submerged land bridge between  
826 Tasmania and mainland Australia (inset). Pie charts show the proportions of individuals identified as  
827 *G. caespitosa* (blue) and *G. gemineoa* (red) by ADMIXTURE analyses. Until now, species ranges  
828 were thought to diverge near Ninety Mile Beach (grey line), which lacks rocky habitat to colonise. (C)  
829 A principal components analysis of genetic variation reveals two distinct clusters corresponding to the  
830 two species, with individuals from western locations (Glenaire to Wilsons Promontory) in green and  
831 individuals from northeastern locations (Wilsons Promontory to Merimbula) in purple. (D)  
832 Ancestries of individuals (vertical bars, coloured as in panel A) suggest little gene flow between  
833 species. Horizontal lines below bars group individuals by location.

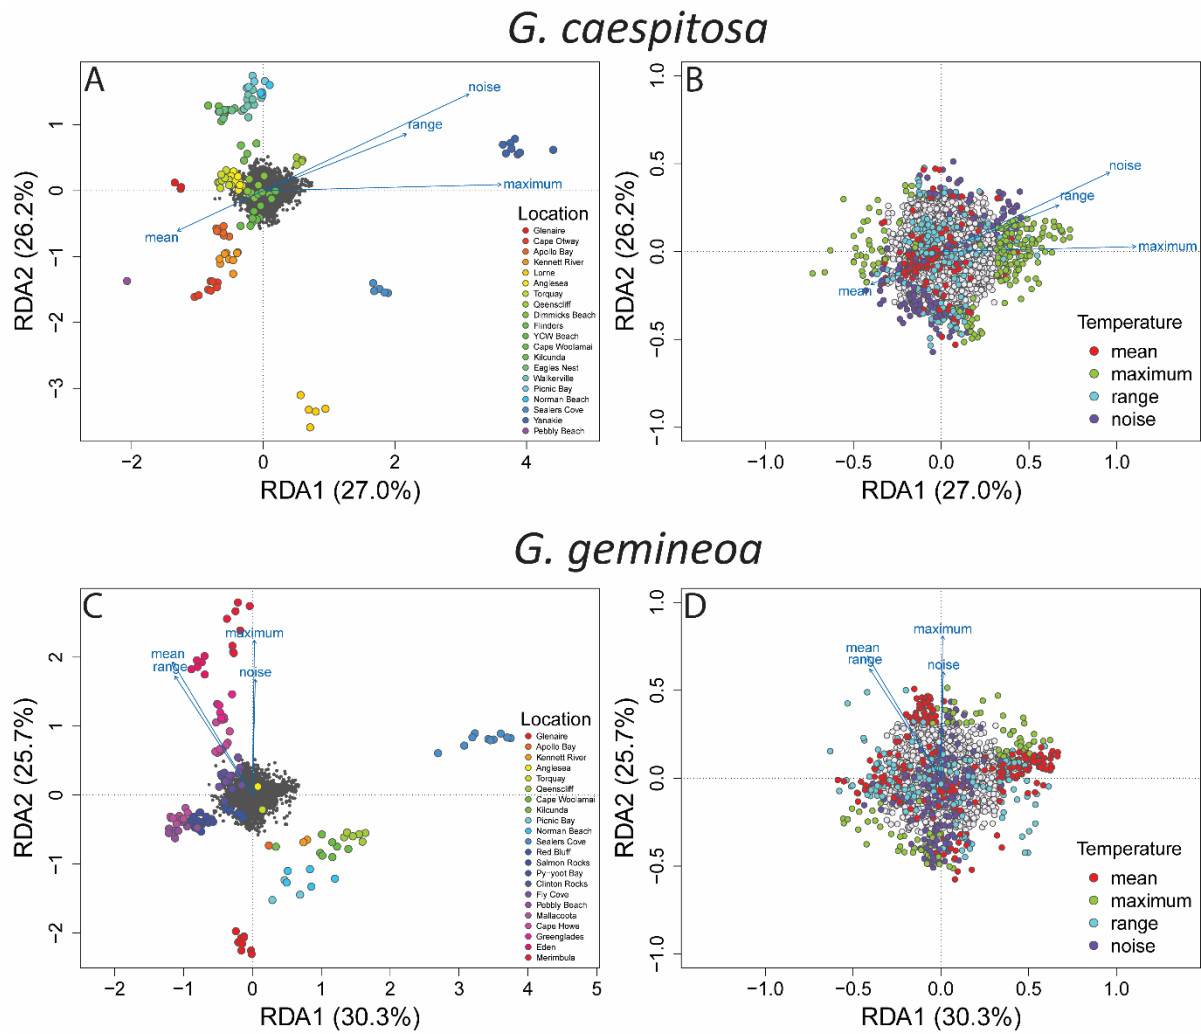

834

835 Figure 2. Associations between genotype and temperature identified for *G. caespitosa* (A–B) and *G.*  
836 *gemineoa* (C–D) by redundancy analysis. Biplots show the two largest ordination axes (RDA1 and  
837 RDA2) per analysis, comprising linear combinations of temperature variables (mean, maximum,  
838 range, and noise structure) that explain 53–56% of associations with multilocus genetic variation per  
839 species (see Figure S4 for other axes). In all panels, closer alignments of items with ordination axes  
840 indicate stronger associations with axes. In (A) and (C), grey points are single loci, other points are  
841 individuals coloured by location, and vectors are variables. In (B) and (D), which magnify left-hand  
842 plots to focus on loci, candidate adaptive loci (identified as significant outliers on ordination axes) are  
843 coloured by the variables they associate most strongly with.

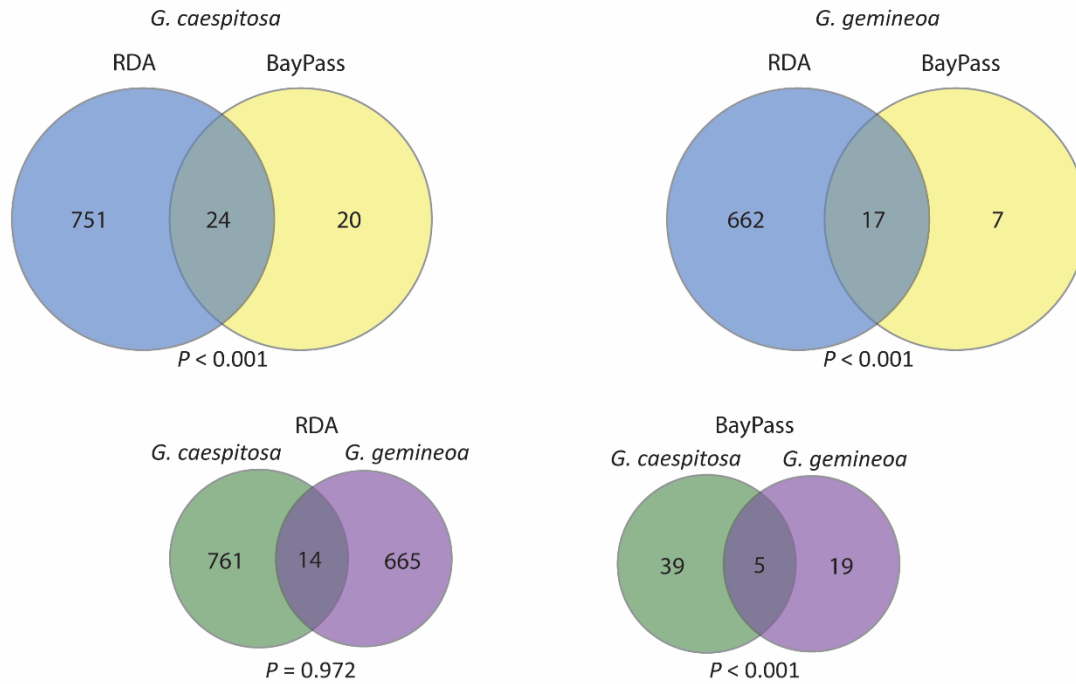

844

845 Figure 3. Candidate adaptive loci identified for *G. caespitosa* and *G. gemineoa* by redundancy  
846 analyses (RDA) versus BayPass analyses. The top row shows overlaps between methods for each  
847 species (overlapping candidates were used to further predict genomic vulnerability; see Figures 4 and  
848 5). The bottom row shows overlaps between species for each method, suggesting that the genetic basis  
849 of adaptation mostly differs between species. *P*-values are the probabilities of observing overlaps by  
850 chance, given the numbers of candidates identified from the numbers of loci screened.

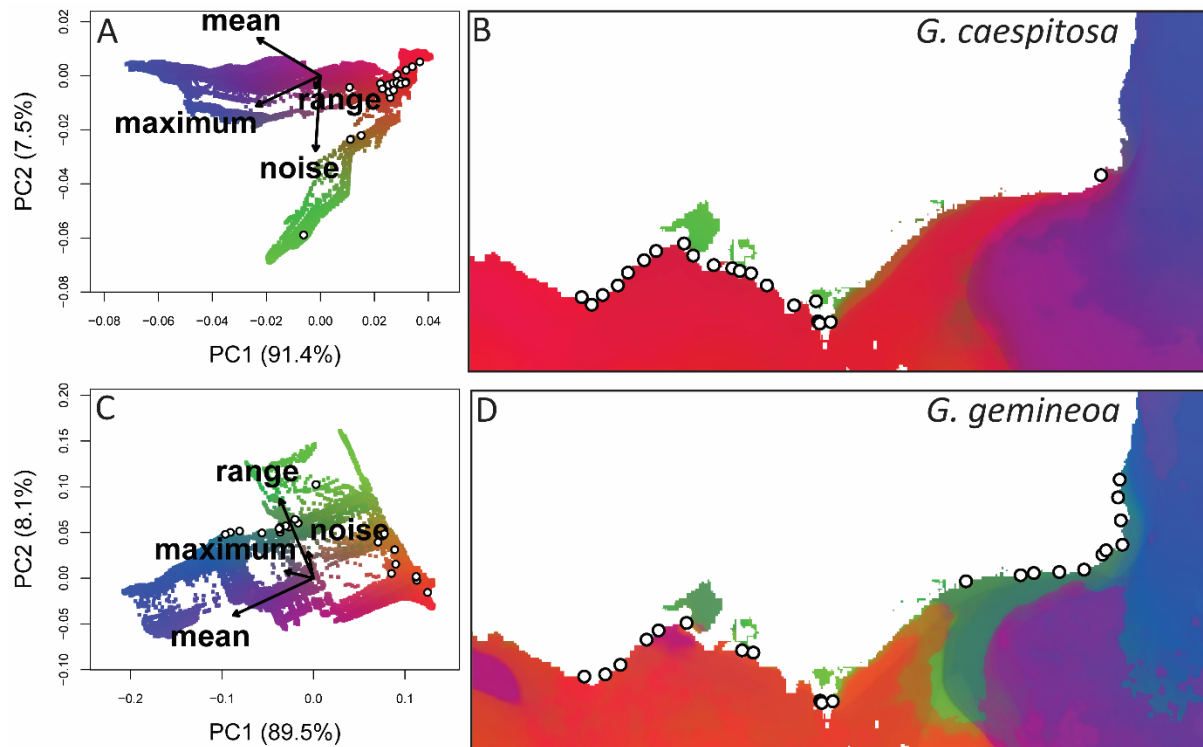

851

852 Figure 4. Temperature-driven turnover in alleles at candidate loci predicted for *G. caespitosa* (A–B)  
853 and *G. gemineoa* (C–D) by gradient forest models. Biplots in (A) and (C) show the two largest  
854 principal components (PC1 and PC2) per model, comprising linear combinations of temperature  
855 variables (mean, maximum, range, and noise colour) that explain 98–99% of allele turnover per  
856 species. Colours predict genetic compositions (allele frequencies) along biplot axes, and vectors relate  
857 compositions to variables (variables have higher values in the directions of vectors and lower values  
858 in opposing directions). Maps in (B) and (D) predict genetic compositions throughout the study range,  
859 and locations with similar colours are predicted to harbour populations with similar compositions. In  
860 all panels, points are locations from which individuals were sampled. Note that species have  
861 planktonic life stages (gametes, embryos, and larvae) that spend days to weeks offshore before  
862 transitioning to sessile life stages (juveniles and adults) onshore in the intertidal.

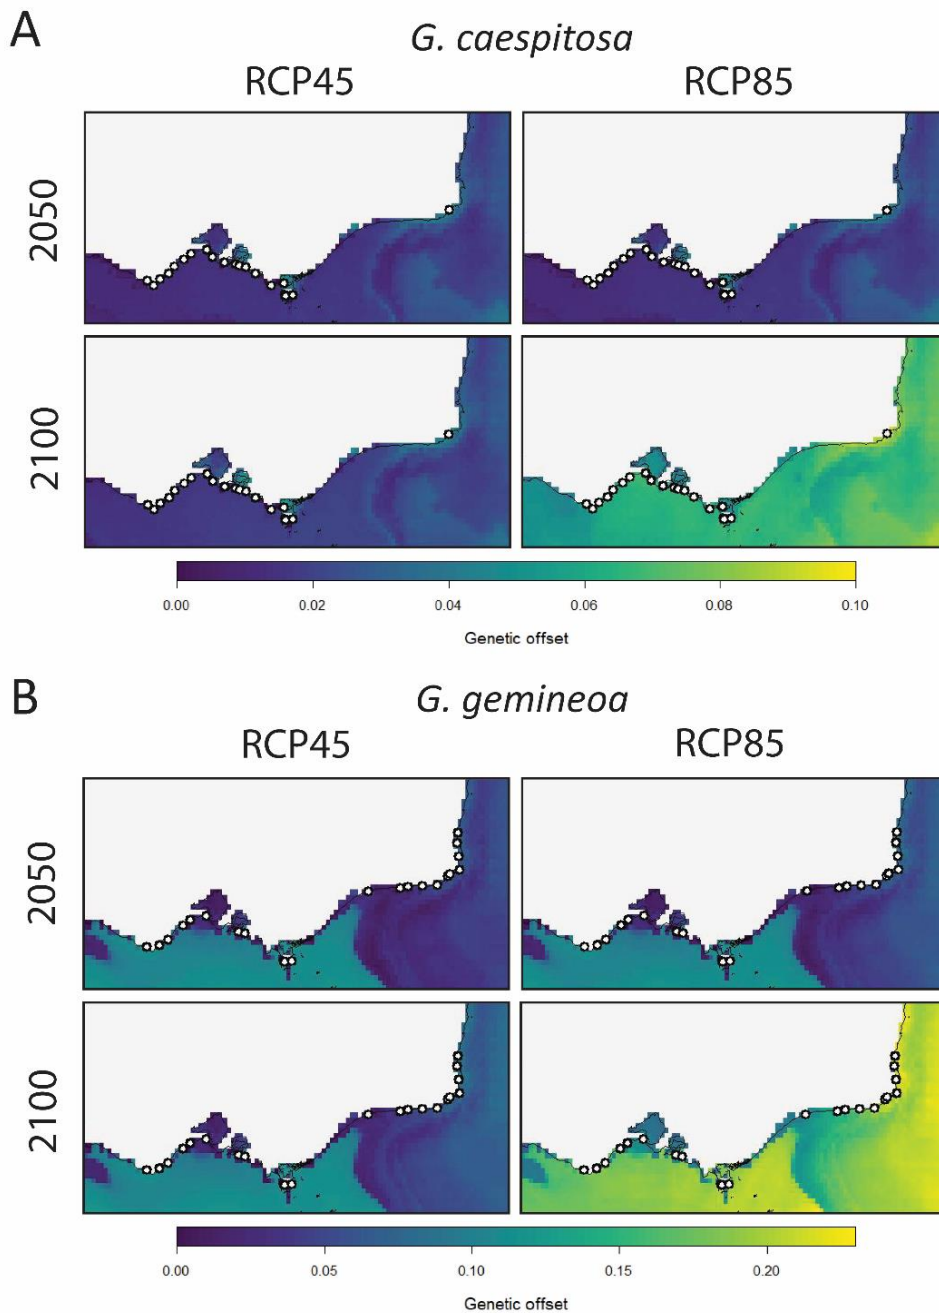

863

864 Figure 5. Genetic offsets needed to maintain thermal adaptation under future climate change for *G.*  
865 *caespitosa* (A) and *G. gemineoa* (B; note the difference in scale between species). Predictions are  
866 shown for 2050 and 2100 under low (RCP45) and high (RCP85) CO<sub>2</sub> emission scenarios. Points are  
867 locations from which individuals were sampled. Note that species have planktonic life stages  
868 (gametes, embryos, and larvae) that spend days to weeks offshore before transitioning to sessile life  
869 stages (juveniles and adults) onshore in the intertidal.

870 **Tables**

871 Table 1. Estimates of genetic diversity for *G. caespitosa* and *G. gemineoa*.  $H_o$  is observed  
872 heterozygosity,  $H_s$  is expected heterozygosity,  $F_{IS}$  is the inbreeding coefficient, and AR is allelic  
873 richness (ranging from one to two because only biallelic loci were analysed). Estimates are averaged  
874 across loci and populations (see supplementary Table S3 for population values) and compared  
875 between species using  $F$ -tests ( $*P < 0.05$ ;  $**P < 0.001$ ).

|                              | $H_o$                      | $H_s$                       | $F_{IS}$             | AR                     |
|------------------------------|----------------------------|-----------------------------|----------------------|------------------------|
| <i>Galeolaria caespitosa</i> |                            |                             |                      |                        |
| Mean $\pm$ SE                | 0.067 $\pm$ 0.001          | 0.097 $\pm$ 0.001           | 0.212 $\pm$ 0.009    | 1.271 $\pm$ 0.016      |
| <i>Galeolaria gemineoa</i>   |                            |                             |                      |                        |
| Mean $\pm$ SE                | 0.059 $\pm$ 0.001          | 0.084 $\pm$ 0.001           | 0.210 $\pm$ 0.010    | 1.220 $\pm$ 0.020      |
|                              | $F_{(1, 40)} = 38.82^{**}$ | $F_{(1, 35)} = 152.61^{**}$ | $F_{(1, 35)} = 0.20$ | $F_{(1, 40)} = 4.70^*$ |

876
